# Supplementary material
Source: MDPI journal article supplement (https://www.mdpi.com/2411-9660/7/3/58)
Supplement: s1 [file s1]

# Exploring the Potential of Microgrids in the Effective Utilisation of Renewable Energy: A Comprehensive Analysis of Evolving Themes and Future Priorities Using Main Path Analysis

Vipin Raj Rajendran Pillai, Rohit Rajasekharan Nair Valsala, Veena Raj, Muhammed Iskandar Petra, Krishnan Nair Satheesh Kumar and Sathyajith Mathew

## Supplementary Figures

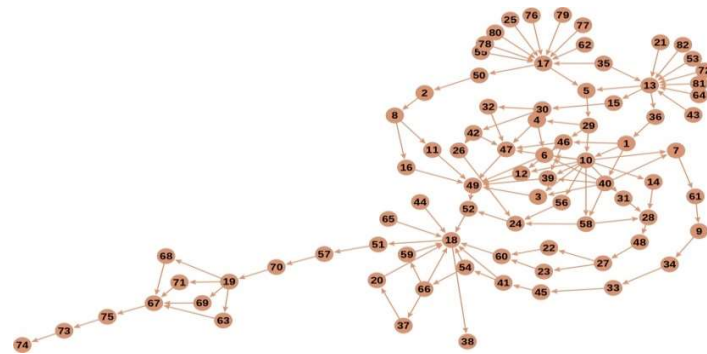

Figure S1. Control Strategies for Microgrids.

- [1] "Mohamed Yari, 2008, Ieee T Power Electr, V23, P2806, Doi 10.1109/tpel.2008.2005100"
- [2] "Guerrero Jm, 2009, Ieee T Ind Electron, V56, P726, Doi 10.1109/tie.2008.2009274"
- [3] "Rocabert J, 2011, Ieee T Power Electr, V26, P2993, Doi 10.1109/tpel.2011.2116126"
- [4] "Chung Iy, 2010, Ieee T Ind Appl, V46, P1078, Doi 10.1109/tia.2010.2044970"
- [5] "Pogaku N, 2007, Ieee T Power Electr, V22, P613, Doi 10.1109/tpel.2006.890003"
- [6] "Hassan Ma, 2011, Ieee T Power Electr, V26, P755, Doi 10.1109/tpel.2010.2100101"
- [7] "Kim Jy, 2010, Ieee T Power Electr, V25, P3037, Doi 10.1109/tpel.2010.2073488"
- [8] "Guerrero Jm, 2011, Ieee T Ind Electron, V58, P158, Doi 10.1109/tie.2010.2066534"
- [9] "Rocabert J, 2012, Ieee T Power Electr, V27, P4734, Doi 10.1109/tpel.2012.2199334"
- [10] "Li Yw, 2009, Ieee T Power Electr, V24, P2977, Doi 10.1109/tpel.2009.2022828"
- [11] "Dasgupta S, 2011, Ieee T Power Electr, V26, P732, Doi 10.1109/tpel.2010.2096590"
- [12] "Kim J, 2011, Ieee T Power Electr, V26, P689, Doi 10.1109/tpel.2010.2091685"
- [13] "Li Yw, 2004, Ieee T Power Electr, V19, P1195, Doi 10.1109/tpel.2004.833456"
- [14] "He Jw, 2012, Ieee T Ind Electron, V59, P444, Doi 10.1109/tie.2011.2141098"
- [15] "Li Yw, 2006, Ieee T Power Electr, V21, P1021, Doi 10.1109/tpel.2006.876844"
- [16] "Dasgupta S, 2011, Ieee T Power Electr, V26, P717, Doi 10.1109/tpel.2010.2096479"
- [17] "Arulampalam A, 2004, Int J Electron, V91, P503, Doi 10.1080/00207210412331289023"
- [18] "Baghaee Hr, 2018, Ieee Syst J, V12, P3108, Doi 10.1109/jsyst.2017.2761792"
- [19] "Eskandari M, 2019, Ieee T Power Syst, V34, P4706, Doi 10.1109/tpwrs.2019.2923797"
- [20] "Baghaee Hr, 2017, Int J Elec Power, V92, P63, Doi 10.1016/j.jepes.2017.04.007"
- [21] "Abdelrahim Nm, 1996, Ieee T Power Electr, V11, P532, Doi 10.1109/63.506118"
- [22] "De Souza Acz, 2015, Iet Renew Power Gen, V9, P954, Doi 10.1049/iet-rpg.2014.0406"
- [23] "Mumtaz F, 2016, Ieee T Sustain Energ, V7, P493, Doi 10.1109/tste.2015.2502482"
- [24] "Babazadeh M, 2013, Ieee T Power Deliver, P1339, Doi 10.1109/tpwrd.2013.2254138"
- [25] "Lasseter Rh, 2002, 2002 Ieee Power Engineering, Doi 10.1109/pesw.2002.985003"
- [26] "Delghavi Mb, 2011, Ieee T Power Deliver, V26, P1764, Doi 10.1109/tpwrd.2011.2119497"
- [27] "Elrayyah A, 2014, Ieee T Power Deliver, V29, P1709, Doi 10.1109/tpwrd.2014.2307279"
- [28] "He Jw, 2011, Ieee T Ind Appl, V47, P2525, Doi 10.1109/tia.2011.2168592"
- [29] "Barklund E, 2008, Ieee T Power Electr, V23, P2346, Doi 10.1109/tpel.2008.2001910"
- [30] "Majumder R, 2009, Iet Renew Power Gen, V3, P109, Doi 10.1049/iet-rpg.20080001"
- [31] "Li Y, 2011, Ieee T Smart Grid, V2, P30, Doi 10.1109/tsg.2010.2095046"
- [32] "Majumder R, 2010, Ieee T Power Syst, V25, P796, Doi 10.1109/tpwrs.2009.2032049"
- [33] "Xin Hh, 2015, Ieee T Smart Grid, V6, P943, Doi 10.1109/tsg.2014.2645165"
- [34] "Nutmaki Iu, 2014, Ieee T Power Electr, V29, P1047, Doi 10.1109/tpel.2013.2276251"
- [35] "Chandorkar Mc, 1993, Ieee T Ind Appl, V29, P136, Doi 10.1109/28.195899"
- [36] "Lee Tl, 2007, Ieee T Power Electr, V22, P1919, Doi 10.1109/tpel.2007.904200"
- [37] "Baghaee Hr, 2018, Ieee Syst J, V12, P2749, Doi 10.1109/jsyst.2016.2645165"
- [38] "He Jw, 2020, Ieee T Power Electr, V35, P9251, Doi 10.1109/tpel.2020.2970462"
- [39] "Wang F, 2011, Ieee T Power Electr, V26, P3501, Doi 10.1109/tpel.2011.2147334"
- [40] "Chen Ci, 2010, Ieee T Power Electr, V25, P6, Doi 10.1109/tpel.2009.2025864"
- [41] "Baghaee Hr, 2018, Ieee Syst J, V12, P444, Doi 10.1109/jsyst.2016.2580617"
- [42] "Rokrok E, 2010, Iet Gener Transm Dis, V4, P562, Doi 10.1049/iet-gtd.2009.0146"
- [43] "Tirumala R, 2002, Appl Power Elect Co, P1081, Doi 10.1109/apec.2002.989378"
- [44] "Baghaee H.r., 2017, Ieee T Ind Inform, V99, P1, Doi Doi 10.1109/tii.2017.2677943"
- [45] "Xin Hh, 2016, Ieee T Smart Grid, V7, P3, Doi 10.1109/tsg.2015.2473096"
- [46] "Iyer Sv, 2010, Ieee T Power Electr, V25, P2420, Doi 10.1109/tpel.2010.2048720"
- [47] "Roslan Am, 2011, Ieee T Power Electr, V26, P702, Doi 10.1109/tpel.2010.2102775"
- [48] "He Jw, 2012, Ieee T Power Electr, V27, P3984, Doi 10.1109/tpel.2012.2190099"
- [49] "Rowe Cn, 2013, Ieee T Power Electr, V28, P3747, Doi 10.1109/tpel.2012.2230190"
- [50] "Prodanovic M, 2006, Ieee T Ind Electron, V53, P1471, Doi 10.1109/tie.2006.882019"
- [51] "Baghaee Hr, 2018, Iet Gener Transm Dis, V12, P1518, Doi 10.1049/iet-gtd.2016.1277"
- [52] "Etemadi Ah, 2014, Ieee T Power Syst, V29, P3102, Doi 10.1109/tpwrs.2014.2312615"
- [53] "Tuladhar A, 1997, Appl Power Elect Co, P94, Doi 10.1109/apec.1997.581439"
- [54] "Baghaee Hr, 2016, Ieee J Em Sel Top P, V4, P1217, Doi 10.1109/jestpe.2016.2581762"
- [55] "Lasseter B, 2001, 2001 Ieee Power Engineering, , Doi 10.1109/pesw.2001.917020"
- [56] "Serban E, 2010, Ieee T Power Electr, V25, P2971, Doi 10.1109/tpel.2010.2050006"
- [57] "Eskandari M, 2019, Iet Renew Power Gen, V13, P296, Doi 10.1049/iet-rpg.2018.5303"
- [58] "De D, 2010, Ieee T Power Electr, V25, P2995, Doi 10.1109/tpel.2010.2068313"
- [59] "Baghaee Hr, 2017, Sustain Energy Techn, V24, P71, Doi 10.1016/j.seta.2017.02.004"
- [60] "Baghaee Hr, 2017, Iet Power Electron, V10, P313, Doi 10.1049/iet-pel.2016.0010"
- [61] "Cho C, 2011, Ieee T Power Electr, V26, P3707, Doi 10.1109/tpel.2011.2162532"
- [62] "Lasseter R H, 2002, White Paper Integrat"
- [63] "Eskandari M, 2020, Ieee T Sustain Energ, V11, P2813, Doi 10.1109/tste.2020.2977330"
- [64] "Illindala M, 2002, Ieee Power Electron, P2013, Doi 10.1109/psec.2002.1023110"
- [65] "Baghaee Hr, 2008, Int Power Elect Mot, P313, Doi 10.1109/epemec.2008.4635284"
- [66] "Baghaee Hr, 2017, J Circuit Syst Comp, V26, P1217, Doi 10.1142/s0218126617500992"
- [67] "Eskandari M, 2021, Ieee T Smart Grid, V12, P999, Doi 10.1109/tsg.2020.3030015"
- [68] "Eskandari M, 2020, Ieee T Sustain Energ, V11, P2825, Doi 10.1109/tste.2020.2977357"
- [69] "Eskandari M, 2020, Ieee T Power Deliver, V35, P1633, Doi 10.1109/tpwrd.2019.2948913"
- [70] "Eskandari M, 2019, Sustain Energy Grids, V18, Doi 10.1016/j.segan.2019.100216"
- [71] "Eskandari M, 2020, Iet Gener Transm Dis, V14, P1366, Doi 10.1049/iet-gtd.2019.0534"
- [72] "Lasseter R, 2000, P 33 Ann Haw Int C S, , Doi 10.1109/tie.2021.3097608"
- [73] "Shabbir Mnsk, 2022, Ieee T Ind Appl, V58, P5860, Doi 10.1109/tia.2022.3181218"
- [74] "Perez-ibacache R, 2021, Ieee T Power Deliver, Doi 10.1109/tpwrd.2020.3037716"
- [75] "Tyll H, 1990, Use Static Var Compe"
- [76] "Johnson Bk, 1994, Ieee T Appl Supercon, V4, P115, Doi 10.1109/77.317825"
- [77] "Maniak M, 2003, Traffic, V4, P1, Doi 10.1034/j.1600-0854.2003.40101.x"
- [78] "Engler A, 2001, Epsvec C Mun Germ"
- [79] "Engler A, 2003, Patent No. 101407831"
- [80] "dspace Gmbh, 1999, Rti Impl Guid"
- [81] "Abdelrahim N, 1994, P 20 Int C Ind El Co, V1, P497"

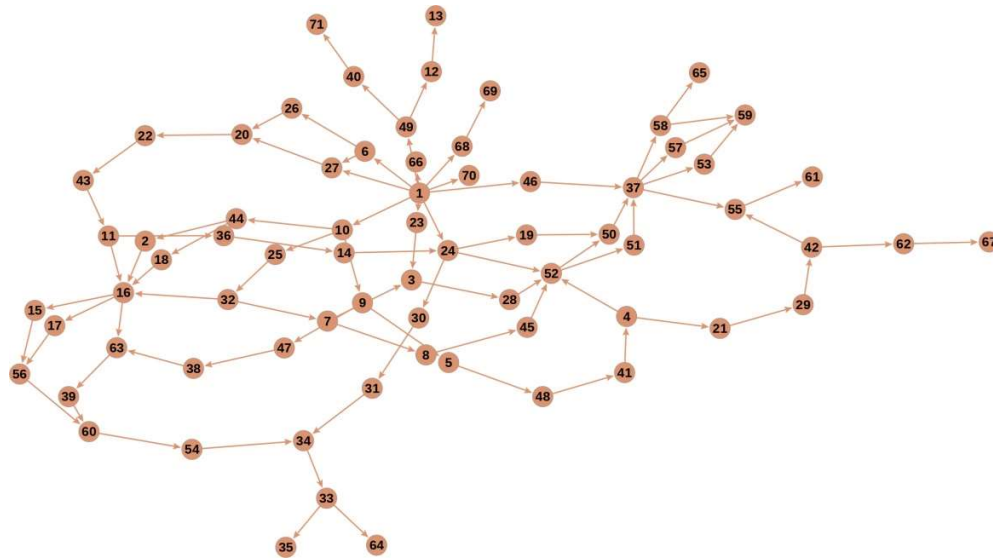

**Figure S2.** Optimization and Management of Microgrid Systems.

- [1] "Moghaddam Aa, 2011, Energy, V36, P6490, Doi 10.1016/j.energy.2011.09.017"
- [2] "Zheng Yy, 2018, Appl Energ, V230, P836, Doi 10.1016/j.apenergy.2018.09.015"
- [3] "Li Y, 2019, Iet Renew Power Gen, V13, P973, Doi 10.1049/iet-rpg.2018.5862"
- [4] "Kim Hj, 2021, Int J Elec Power, V124, Doi 10.1016/j.ijepes.2020.106422"
- [5] "El-bidairi Ks, 2018, Energ Convers Manage, Doi 10.1016/j.enconman.2018.08.076"
- [6] "Rezaei N, 2014, Energ Convers Manage, Doi 10.1016/j.enconman.2014.08.054"
- [7] "Lu Xh, 2018, J Clean Prod, V195, P187, Doi 10.1016/j.jclepro.2018.05.190"
- [8] "Rezaei N, 2020, Energy, V201, Doi 10.1016/j.energy.2020.117629"
- [9] "Nojavan S, 2017, Energy, V139, P89, Doi 10.1016/j.energy.2017.07.148"
- [10] "Wang Cs, 2016, Energy, V97, P90, Doi 10.1016/j.energy.2015.12.099"
- [11] "Bazmohammadi N, 2019, Int J Elec Power, Doi 10.1016/j.ijepes.2019.02.033"
- [12] "Elgamal M, 2022, Appl Energ, V309, Doi 10.1016/j.apenergy.2021.118416"
- [13] "Dong Yl, 2022, Electr Pow Syst Res, V211, Doi 10.1016/j.epsr.2022.108181"
- [14] "Ahmadi Se, 2020, Int J Elec Power, V118, Doi 10.1016/j.ijepes.2019.105760"
- [15] "Bahmani R, 2020, Int J Elec Power, V117, Doi 10.1016/j.ijepes.2019.105606"
- [16] "Karimi H, 2019, Energy, V186, Doi 10.1016/j.energy.2019.115912"
- [17] "Karimi H, 2020, Energy, V195, Doi 10.1016/j.energy.2020.116992"
- [18] "Shahryari E, 2019, Energy, V175, P879, Doi 10.1016/j.energy.2019.03.129"
- [19] "Nasiraghdam H, 2020, Sustain Energy Techn, V42, Doi 10.1016/j.seta.2020.100832"
- [20] "Vahedipour-dahraie M, 2017, Iet Renew Power Gen, Doi 10.1049/iet-rpg.2017.0168"
- [21] "Wang C, 2021, J Energy Storage, V33, Doi 10.1016/j.est.2020.102111"
- [22] "Vahedipour-dahraie M, 2018, Iet Renew Power Gen, Doi 10.1049/iet-rpg.2017.0720"
- [23] "Javidsharifi M, 2018, Appl Energ, V216, P367, Doi 10.1016/j.apenergy.2017.12.119"
- [24] "Luo L, 2020, J Energy Storage, V28, Doi 10.1016/j.est.2020.101306"
- [25] "Choobineh M, 2016, J Clean Prod, V139, Doi 10.1016/j.jclepro.2016.08.138"
- [26] "Rezaei N, 2015, Energ Convers Manage, Doi 10.1016/j.enconman.2014.12.049"
- [27] "Rezaei N, 2015, Int J Elec Power, V69, P273, Doi 10.1016/j.ijepes.2015.01.023"
- [28] "Murty Vvsn, 2020, Prot Contr Mod Pow, V5, Doi 10.1186/s41601-019-0147-z"
- [29] "Mansouri Sa, 2021, Sustain Cities Soc, V69, Doi 10.1016/j.scs.2021.102852"
- [30] "Yin N, 2021, J Clean Prod, V282, Doi 10.1016/j.jclepro.2020.124435"
- [31] "Aldosary A, 2021, Neural Comput Appl, Doi 10.1007/s00521-021-05768-3"
- [32] "Koltsaklis Ne, 2018, Chem Eng Res Des, P318, Doi 10.1016/j.cherd.2017.07.030"
- [33] "Mobasseri A, 2022, J Clean Prod, V333, Doi 10.1016/j.jclepro.2021.130174"
- [34] "Habeeb Sa, 2021, Electronics-switz, V10, Doi 10.3390/electronics10202484"
- [35] "Ahmadi S, 2022, Int J Energ Res, V46, P12854, Doi 10.1002/er.8058"
- [36] "Bazmohammadi N, 2019, Ieee T Ind Appl, Doi 10.1109/tia.2019.2918051"
- [37] "Kumar Rs, 2021, Appl Energ, V301, Doi 10.1016/j.apenergy.2021.117466"
- [38] "Pourghasem P, 2019, Electr Pow Syst Res, Doi 10.1016/j.epsr.2019.04.021"
- [39] "Shams Mh, 2021, Energy, V222, Doi 10.1016/j.energy.2021.119894"
- [40] "Rajamand S, 2020, J Energy Storage, V32, Doi 10.1016/j.est.2020.101935"
- [41] "Kim Hj, 2019, Energies, V12, Doi 10.3390/en12214142"
- [42] "Mansouri Sa, 2022, Energy, V245, Doi 10.1016/j.energy.2022.123228"
- [43] "Bazmohammadi N, 2018, Iet Gener Transm Dis, Doi 10.1049/iet-gtd.2017.2061"
- [44] "Zheng Yy, 2018, Renew Energ, V123, P204, Doi 10.1016/j.renene.2018.01.120"
- [45] "Zhu Jj, 2021, Energy, V216, Doi 10.1016/j.energy.2020.119224"
- [46] "Raghav Lp, 2021, Ieee T Smart Grid, V12, P4834, Doi 10.1109/tsg.2021.3092283"
- [47] "Majidi M, 2019, Appl Therm Eng, Doi 10.1016/j.applthermaleng.2018.12.088"
- [48] "Fan H, 2018, Appl Sci-basel, V8, Doi 10.3390/app8122560"
- [49] "Kim Th, 2020, Energy, V202, Doi 10.1016/j.energy.2020.117669"
- [50] "Kumar Rs, 2021, Int J Energ Res, V45, P18695, Doi 10.1002/er.6984"
- [51] "Raghav Lp, 2021, Int J Energ Res, V45, P18919, Doi 10.1002/er.6995"
- [52] "Kumar Rs, 2021, Appl Energ, V285, Doi 10.1016/j.apenergy.2021.116435"
- [53] "Raghav Lp, 2022, Int J Energ Res, V46, P1864, Doi 10.1002/er.7303"
- [54] "Mansourlakouraj M, 2021, J Clean Prod, Doi 10.1016/j.jclepro.2021.128452"
- [55] "Khosravi M, 2022, Int J Elec Power, V139, Doi 10.1016/j.ijepes.2022.108013"
- [56] "Garcia-torres F, 2021, Ieee T Smart Grid, Doi 10.1109/tsg.2020.3043821"
- [57] "Singh Ar, 2022, Int J Energ Res, V46, P4301, Doi 10.1002/er.7427"
- [58] "Raghav Lp, 2022, Appl Energ, V306, Doi 10.1016/j.apenergy.2021.118058"
- [59] "Raju Dk, 2022, J Clean Prod, V374, Doi 10.1016/j.jclepro.2022.133881"
- [60] "Mansourlakouraj M, 2021, Ieee T Ind Appl, Doi 10.1109/tia.2021.3073882"
- [61] "Jiang W, 2022, J Energy Storage, V55, Doi 10.1016/j.est.2022.105311"
- [62] "Tostado-veliz M, 2022, Appl Energ, Doi 10.1016/j.apenergy.2022.119162"
- [63] "Kia M, 2020, Energy, V208, Doi 10.1016/j.energy.2020.118418"
- [64] "Tostado-veliz M, 2022, Appl Energ, Doi 10.1016/j.apenergy.2022.118611"
- [65] "Dashtdar M, 2022, Sustainability-basel, V14, Doi 10.3390/su14116759"
- [66] "Li N, 2021, Sustain Cities Soc, V75, Doi 10.1016/j.scs.2021.103279"
- [67] "Vergine S, 2022, Energy Rep, V8, P9402, Doi 10.1016/j.egyr.2022.07.044"
- [68] "Kim Hy, 2019, Appl Sci-basel, V9, Doi 10.3390/app9204219"
- [69] "Tong X, 2019, Appl Sci-basel, V9, Doi 10.3390/app9245436"
- [70] "Jana D, 2020, Int T Electr Energy, V30, Doi 10.1002/2050-7038.12195"
- [71] "Harsh P, 2022, Renew Sust Energ Rev, V160, Doi 10.1016/j.rser.2022.112251"

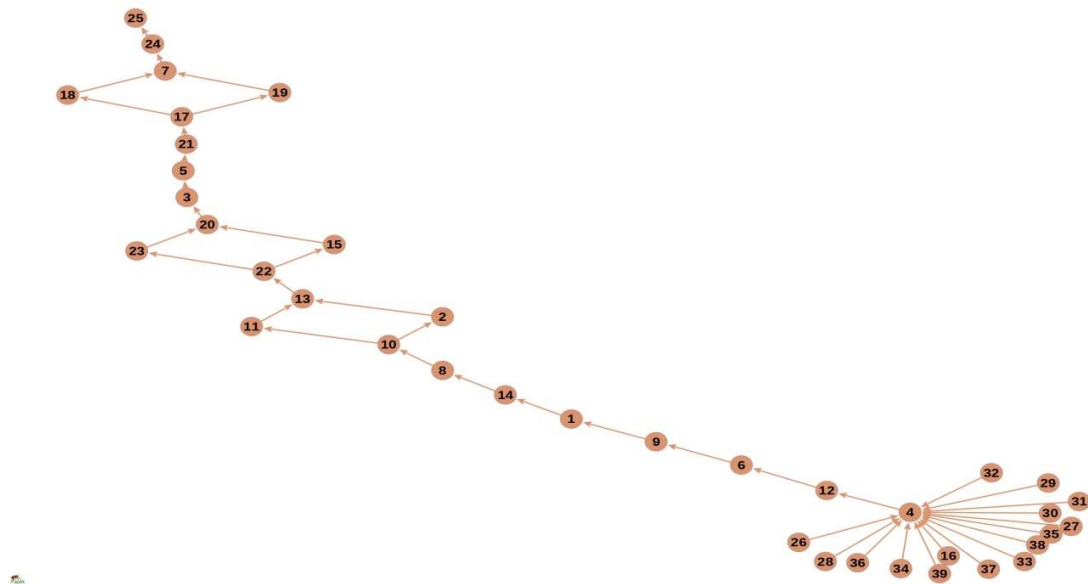

Figure S3. Microgrid Regulation.

- [1] "Guo Fh, 2015, Ieee T Ind Electron, V62, P4355, Doi 10.1109/tie.2014.2379211"
- [2] "Chen M, 2018, Ieee T Ind Inform, V14, P3870, Doi 10.1109/tii.2017.2784561"
- [3] "#Lai Jg, 2020, Ieee T Smart Grid, V11, P2746, Doi 10.1109/tsg.2020.2966691"
- [4] "Dimeas Al, 2005, Ieee T Power Syst, V20, P1447, Doi 10.1109/tpwrs.2005.852060"
- [5] "Lai Jg, 2020, Ieee T Ind Appl, V56, P3125, Doi 10.1109/tia.2020.2971864"
- [6] "Nunna Hsvsk, 2013, Ieee T Ind Electron, V60, P1678, Doi 10.1109/tie.2012.2193857"
- [7] "Deng C, 2022, Ieee T Ind Electron, V69, P11560, Doi 10.1109/tie.2021.3120492"
- [8] "Guo Fh, 2015, Ieee T Ind Inform, V11, P1078, Doi 10.1109/tii.2015.2462773"
- [9] "Shafiee Q, 2014, Ieee T Ind Electron, V61, P5363, Doi 10.1109/tie.2013.2293711"
- [10] "Lu Xq, 2017, Ieee T Ind Inform, V13, P448, Doi 10.1109/tii.2016.2603844"
- [11] "Lu Xq, 2018, Ieee T Ind Inform, V14, P3956, Doi 10.1109/tii.2017.2783334"
- [12] "Logenthiran T, 2011, Electr Pow Syst Res, V81, P138, Doi 10.1016/j.epsr.2010.07.019"
- [13] "Chen G, 2015, Ieee T Ind Electron, V62, P7079, Doi 10.1109/tie.2015.2431631"
- [14] "Lai Jg, 2019, Ieee Syst J, V13, P4269, Doi 10.1109/jsyst.2019.2901711"
- [15] "Bertsekas D. P., 1992, Computational Optimization And Applications, V1, P277"
- [16] "Lian Zj, 2021, Ieee T Ind Electron, V68, P8367, Doi 10.1109/tie.2020.3016272"
- [17] "Yao Wt, 2022, Ieee T Power Syst, V37, P330, Doi 10.1109/tpwrs.2021.3092717"
- [18] "Lian Zj, 2021, Ieee T Smart Grid, V12, P4494, Doi 10.1109/tsg.2021.3084348"
- [19] "Lai Jg, 2020, Ieee T Syst Man Cy-s, V50, P100, Doi 10.1109/tsmc.2019.2924612"
- [20] "Lai Jg, 2020, Int J Elec Power, V119, Doi 10.1016/j.ijepes.2020.105900"
- [21] "Lai Jg, 2019, Ieee T Ind Appl, V55, P2241, Doi 10.1109/tia.2019.2898367"
- [22] "Lai Jg, 2019, Iet Gener Transm Dis, V13, P2976, Doi 10.1049/iet-gtd.2018.5946"
- [23] "Lu Jh, 2022, Ieee T Sustain Energ, V13, P1469, Doi 10.1109/tste.2022.3162757"
- [24] "Zuo S, 2022, Energies, V15, Doi 10.3390/en15207458"
- [25] "Bertsekas D.p., 1992, Computational Optimi, V1, P7, Doi 10.1007/bf00247653"
- [26] "Ygge F, 1999, J Artif Intell Res, V11, P301, Doi 10.1613/jair.627"
- [27] "Zhou M, 2003, 2003 Ieee Power Engineering Society General Meeting, Doi 10.1109/pes.2003.1267215"
- [28] "Bradshaw J., 1997, Software Agents"
- [29] "Ferber J, 1999, Multi Agent Systems"
- [30] "Nagata T, 2003, P Isap 2003 Sep"
- [31] "Hossack Ja, 2003, Ieee T Power Syst, Doi 10.1109/tpwrs.2003.810910"
- [32] "\*microgrids, Rel Pow Small Pack"
- [33] "Hiyama T, P Isap 2003"
- [34] "\*fipa, 1997, Fipa 97 Spec 2"
- [35] "Papathanassiou S, 2004, P 31 Pesc 2004 Jun"
- [36] "Tsikalakis A, 2005, P Cigre S Pow Syst D"
- [37] "Lasseter R, Lbnl50829 Certs"
- [38] "Dimeas A., 2004, P Ieee Pes Gen M Den"

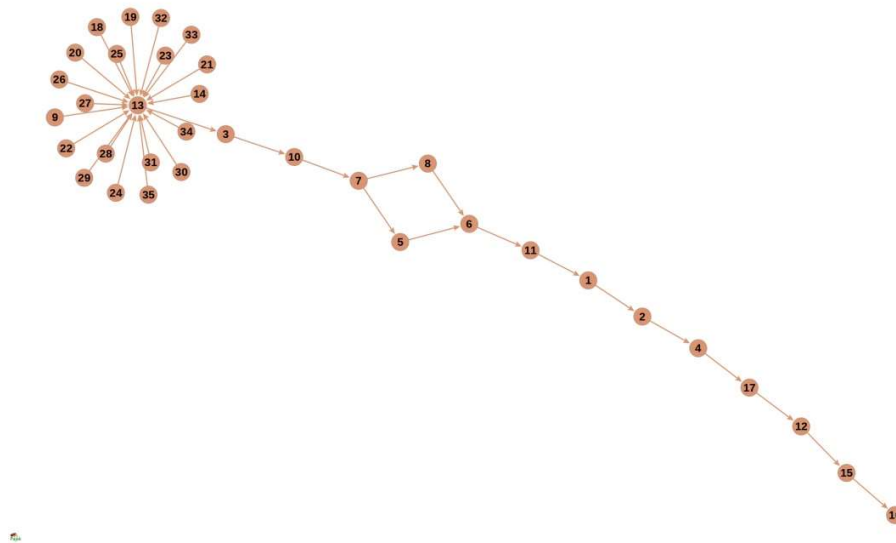

**Figure S4.** Stability of Microgrids.

- [1] "Barik Ak, 2019, Iet Gener Transm Dis, V13, P2889, Doi 10.1049/iet-gtd.2019.0166"
- [2] "Latif A, 2020, Iet Renew Power Gen, V14, P1074, Doi 10.1049/iet-rpg.2019.0940"
- [3] "Bevrani H, 2012, Ieee T Smart Grid, V3, P1935, Doi 10.1109/tsg.2012.2196806"
- [4] "Zaheeruddin, 2022, Iete J Res, V68, P2848, Doi 10.1080/03772063.2020.1730249"
- [5] "Khooban Mh, 2018, Ieee T Sustain Energ, V9, P853, Doi 10.1109/tste.2017.2763607"
- [6] "Gheisarnejad M, 2019, Soft Comput, V23, P5785, Doi 10.1007/s00500-018-3243-5"
- [7] "Bevrani H, 2016, Ieee T Smart Grid, V7, P706, Doi 10.1109/tsg.2015.2446984"
- [8] "Khooban Mh, 2018, Ieee T Sustain Energ, V9, P843, Doi 10.1109/tste.2017.2763605"
- [9] "Canever D, Power Engineering Society, Doi 10.1109/pess.2001.970111"
- [10] "Pan I, 2015, Ieee T Smart Grid, V6, P36, Doi 10.1109/tsg.2014.2336771"
- [11] "Latif A, 2019, Iet Renew Power Gen, V13, P725, Doi 10.1049/iet-rpg.2018.5419"
- [12] "Yildirim B, 2021, Int J Hydrogen Energ, Doi 10.1016/j.ijhydene.2020.08.185"
- [13] "Datta M, 2009, Ieee T Energy Conver, V24, P153, Doi 10.1109/tec.2008.2008870"
- [14] "Kobayashi K, 2006, Sol Energ Mat Sol C, V90, P2975, Doi 10.1016/j.solmat.2006.06.050"
- [15] "Zhu Yy, 2021, Energy Rep, V7, P6820, Doi 10.1016/j.egyr.2021.10.056"
- [16] "Zhong C, 2022, Energy Rep, V8, P8361, Doi 10.1016/j.egyr.2022.06.030"
- [17] "Ozdemir Mt, 2020, Int J Hydrogen Energ, Doi 10.1016/j.ijhydene.2020.05.211"
- [18] "Asano H, 1996, Ieee T Energy Conver, V11, P188, Doi 10.1109/60.486595"
- [19] "Hoff Te, 2007, Sol Energy, V81, P940, Doi 10.1016/j.solener.2006.11.011"
- [20] "Yanagawa S, 2001, 2001 Power Engineering Society, Doi 10.1109/pess.2001.970323"
- [21] "Tsoukalas L. H., 1997, Fuzzy Neural Approac" Doi 10.1016/s0038-092x(00)00146-8"
- [22] "Kinjo T, 2006, Ieee T Energy Conver, V21, P221, Doi 10.1109/tec.2005.853752"
- [23] "Ina N, 2005, Electr Eng Jpn, V152, P10, Doi 10.1002/eej.20106"
- [24] "Rahman M. H., Doi 10.1541/ieejpes.125.399"
- [25] "Bartolini G, 1982, P Cyb Syst Res Amst, P721"
- [26] "Hayashi D., 1996, P Isap 2005 Mar, V11, P188"
- [27] "Nagayoshi H, 2001, Sol Energ Mat Sol C, Doi 10.1016/s0927-0248(00)00332-9"
- [28] "Senjyu T, 2007, P Ieee Pow Eng Soc G, P1, Doi 10.1109/pes.2007.386252"
- [29] "Chen Yk, 2002, Ieee T Aero Elec Sys, Doi 10.1109/taes.2002.1039410"
- [30] "Kim Hs, 2001, Sol Energ Mat Sol C, Doi 10.1016/s0927-0248(00)00328-7"
- [31] "Barton Jp, 2006, J Power Sources, Doi 10.1016/j.jpowsour.2005.07.006"
- [32] "Burkhardt Dg, 1992, Doi 10.1109/fuzzy.1992.258615"
- [33] "Wu Tf, 1994, P 34 Ind Appl Soc An, V3, P1887"
- [34] "Wanger R, 1997, J Power Sources, V67, P163"

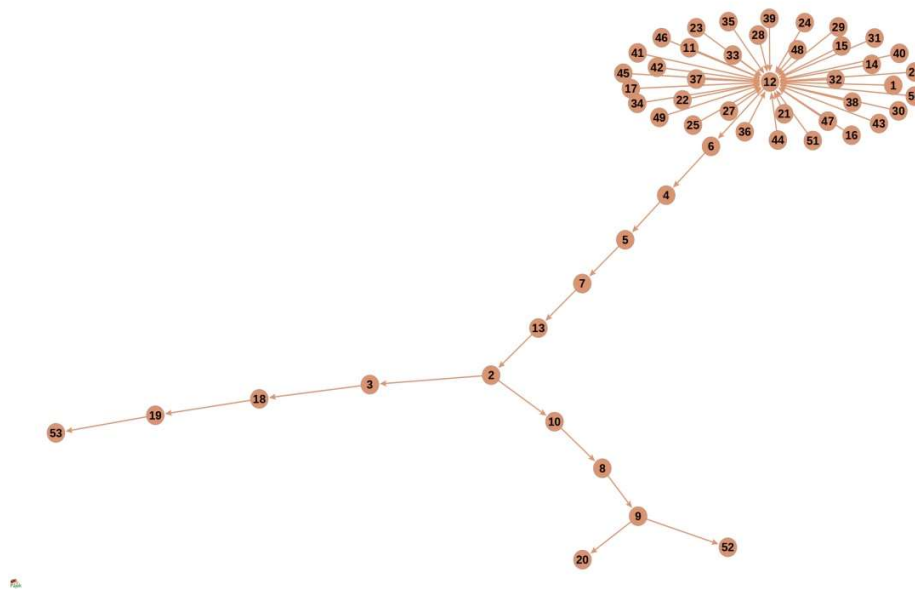

**Figure S5.** Microgrid-Energy Storage.

- [1] "Papaefthymiou Sv, 2014, Renew Energ, Doi 10.1016/j.renene.2013.10.047
- [2] "Elkadeem Mr, Energ Convers Ma, Doi 10.1016/j.enconman.2019.06.085
- [3] "Elkadeem Mr, 2020, Sustain Cities Soc, Doi 10.1016/j.scs.2019.102013
- [4] "Ma T, 2015, Appl Energ, V160, P728, Doi 10.1016/j.apenergy.2014.11.026
- [5] "Mazzola S, 2016, Appl Energ, V169, Doi 10.1016/j.apenergy.2016.02.051"
- [6] "Ma T, 2014, Renew Energ, V69, P7, Doi 10.1016/j.renene.2014.03.028
- [7] "Ahmad J, 2018, Energy, V148, P208, Doi 10.1016/j.energy.2018.01.133"
- [8] "Kharrich M, 2021, Sustainability-basel, V13, Doi 10.3390/su13094708
- [9] "Kharrich M, 2022, J Energy Storage, V51, Doi 10.1016/j.est.2022.104343
- [10] "Kharrich M, 2021, Ieee Access, V9, Doi 10.1109/access.2021.3051573"
- [11] "Ma T, 2013, Appl Energ, V112, P663, Doi 10.1016/j.apenergy.2012.12.004
- [12] "Ma T, 2014, Energ Convers Manage, Doi 10.1016/j.enconman.2013.12.047"
- [13] "Djelailia O, 2019, Sustain Cities Soc, V44, P1, Doi 10.1016/j.scs.2018.09.037"
- [14] "Krieger Em, 2013, Energy, V60, P492, Doi 10.1016/j.energy.2013.08.029"
- [15] "Spyrou Id, 2010, Desalination, V257, P137, Doi 10.1016/j.desal.2010.02.033"
- [16] "Baker J, 2008, Energ Policy, V36, P4368, Doi 10.1016/j.enpol.2008.09.040
- [17] "Rastler D.m., 2010, Elect Energy Storage"
- [18] "Abo-elyousr Fk, 2021, Appl Energ, Doi 10.1016/j.apenergy.2021.117384
- [19] "Cetinbas I, 2022, Ieee Access, V10, Doi 10.1109/access.2022.3151119"
- [20] "Kharrich M, 2022, Energy Rep, Doi 10.1016/j.egy.2022.08.278
- [21] "Manolagos D, 2004, Energy, Doi 10.1016/j.energy.2003.08.008
- [22] "Bakos Gc, 2002, Appl Energ, Doi 10.1016/s0306-2619(02)00045-4
- [23] "Li Rs, 2010, Int Conf Comp Sci, P402, Doi 10.1109/iccsit.2010.5564087
- [24] "Saini R., 2011, Large Scale Energy S
- [25] "Li Yq, Mater Res-switz, Doi 10.4028/www.scientific.net/amr.354-355.1132
- [26] "[anonymous], 1995, Stand Phot Syst Hdb
- [27] "Dursun B, 2010, Renew Sust Energ Rev, Doi 10.1016/j.rser.2010.03.030
- [28] "Medic Zb, 2013, J Renew Sustain Ener, V5, Doi 10.1063/1.4813000"
- [29] "Lacerda Vg, 2009, J Power Sources, Doi 10.1016/j.jpowsour.2009.05.004
- [30] "Bucher W, 1996, Energy Sustain Dev, V3, P8"
- [31] "Power I, 1986, Solar Powered Pumpin"
- [32] "Nfah Em, 2009, Renew Energ, V34, P1445, Doi 10.1016/j.renene.2008.10.019
- [33] "Rahman F, 2012, Renew Sust Energ Rev, Doi 10.1016/j.rser.2011.07.153
- [34] "[anonymous], 1993, Rel Maint Guid Man M"
- [35] "Punys P, 2013, Renew Sust Energ Rev, Doi 10.1016/j.rser.2013.05.072
- [36] "Chow Lch, 2010, Energ Policy, V38, P2076, Doi 10.1016/j.enpol.2009.05.047
- [37] "Greacen C, 2006, Comp Feasibility Sto
- [38] "[anonymous], 2007, Comp An Inf Ex Rur E
- [39] "Oxera, 2011, Disc Rat Low Carb Re"
- [40] "Okou R, 2011, Energy, Doi 10.1016/j.energy.2011.07.051
- [41] "Bermudez Jm, , Doi 10.1016/j.enconman.2013.11.021
- [42] "Pina A, , Doi 10.1109/icset.2008.4747098"
- [43] "Prodromidis Gn, Doi 10.1016/j.renene.2011.07.041
- [44] "Seligman P, 2010, Austr Sustainable En
- [45] "Rabiee A, 2013, Doi 10.1016/j.rser.2012.09.039
- [46] "Connolly A, 2018, 8 Digital Technologi"
- [47] "Depernet D, 2012, Doi 10.1016/j.jpowsour.2012.07.053
- [48] "Mahmoud Mm, 2004, Doi 10.1016/j.epr.2003.12.018"
- [49] "[anonymous], Home Power Magaz
- [50] "Caralis G, 1923, Int C Res En Sav Isl"
- [51] "Landers R. R., 1996, Product Assurance Di"
- [52] "Abd El-sattar H, 2022, Doi 10.1016/j.energy.2022.124901
- [53] "Mohseni S, 2022, Doi 10.1016/j.egy.2022.08.254



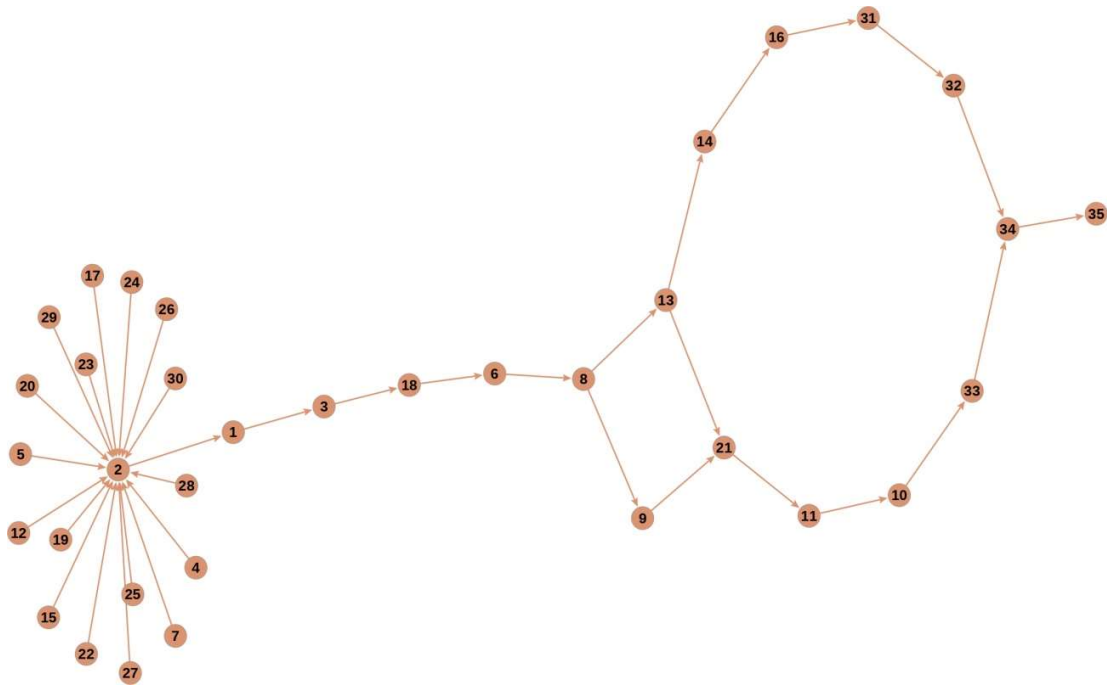

Figure S6. Microgrid-Protection.

- [1] "Zamani Ma, 2011, Ieee T Power Deliver, V26, P1873, Doi 10.1109/tpwr.2011.2120628"
- [2] "Sortomme E, 2010, Ieee T Power Deliver, V25, P2789, Doi 10.1109/tpwr.2009.2035810"
- [3] "Zamani Ma, 2012, Ieee T Smart Grid, V3, P2088, Doi 10.1109/tsg.2012.2211045"
- [4] "Lai Tm, 2006, Electr Pow Syst Res, V76, P626, Doi 10.1016/j.epsr.2005.12.021"
- [5] "Elkalashy Ni, 2007, Ieee T Dielect El In, V14, P375, Doi 10.1109/tdei.2007.344617"
- [6] "Mishra Dp, 2016, Ieee T Smart Grid, V7, P2295, Doi 10.1109/tsg.2015.2487501"
- [7] "Nam Sr, 2001, Power Engineering Society Summer Meeting, Doi 10.1109/pess.2001.970231"
- [8] "Bukhari Sba, 2017, Int J Elec Power, V92, P156, Doi 10.1016/j.ijepes.2017.05.003"
- [9] "Bukhari Sba, 2018, Int J Elec Power, V98, P209, Doi 10.1016/j.ijepes.2017.11.045"
- [10] "Nahas Ew, 2020, Electr Pow Syst Res, V187, Doi 10.1016/j.epsr.2020.106432"
- [11] "Shamsoddini M, 2020, Int J Elec Power, V120, Doi 10.1016/j.ijepes.2020.105992"
- [12] "Saeedifard M, 2007, Ieee Power Eng Soc, P5"
- [13] "Manohar M, 2018, Iet Sci Meas Technol, V12, P200, Doi 10.1049/iet-smt.2017.0270"
- [14] "Manohar M, 2018, Comput Electr Eng, V72, P369, Doi 10.1016/j.compeleceng.2018.10.005"
- [15] "Redfern Ma, 2008, P Iet 9 Int C Dev Po, P670"
- [16] "Manohar M, 2020, Ieee Syst J, V14, P3430, Doi 10.1109/jsyst.2020.2964990"
- [17] "Sortomme E, 2008, North Amer Pow Symp, P359"
- [18] "Zamani Ma, 2013, Electr Pow Syst Res, V104, P52, Doi 10.1016/j.epsr.2013.06.006"
- [19] "Ekles S, 2009, Detecting High Imped"
- [20] "Zeineldin Hh, ower Systems Conference Advanced Metering, Doi 10.1109/psamp.2006.285379"
- [21] "Manohar M, 2019, Int J Elec Power, V108, P271, Doi 10.1016/j.ijepes.2019.01.015"
- [22] "\*schw Eng Lab Inc, Sel 751a Feed Prot R"
- [23] "Wester Cg, 2008, High Impedance Fault"
- [24] "Chen F, 2004, Ieee T Power Syst, V19, P826, Doi 10.1109/tpwrs.2004.825913"
- [25] "\*eu Comm Dir Gen R, 2006, Eur Smartgrid Techn"
- [26] "Green Tc, 2007, P Ieee Int C Syst En, P1"
- [27] "\*el Distr Syst Pro, 1990, Coop Pow Syst"
- [28] "Horowitz Sh, 2008, Power System Relayin, P259"
- [29] "O&#39;neill-carrillo E, 1999, Ieee T Power Deliver, V14, P537, Doi 10.1109/61.754100"
- [30] "\*schw Eng Lab Inc, 2008, Sel 3378 Synchr Vect" 0.1809"
- [31] "Singh M, 2020, Iet Gener Transm Dis, V14, P4989, Doi 10.1049/iet-gtd.2020.0736"
- [32] "Singh M, 2021, Sustain Energy Grids, V28, Doi 10.1016/j.segan.2021.100552"
- [33] "Tiwari Sp, 2021, Sustain Energy Grids, V26, Doi 10.1016/j.segan.2021.100460"
- [34] "Rameshrao Ag, 2022, Sustain Energy Grids, V30, Doi 10.1016/j.segan.2022.100680"
- [35] "Rameshrao Ag, 2022, Renew Energ, V198, P75, Doi 10.1016/j.renene.2022.08.028"

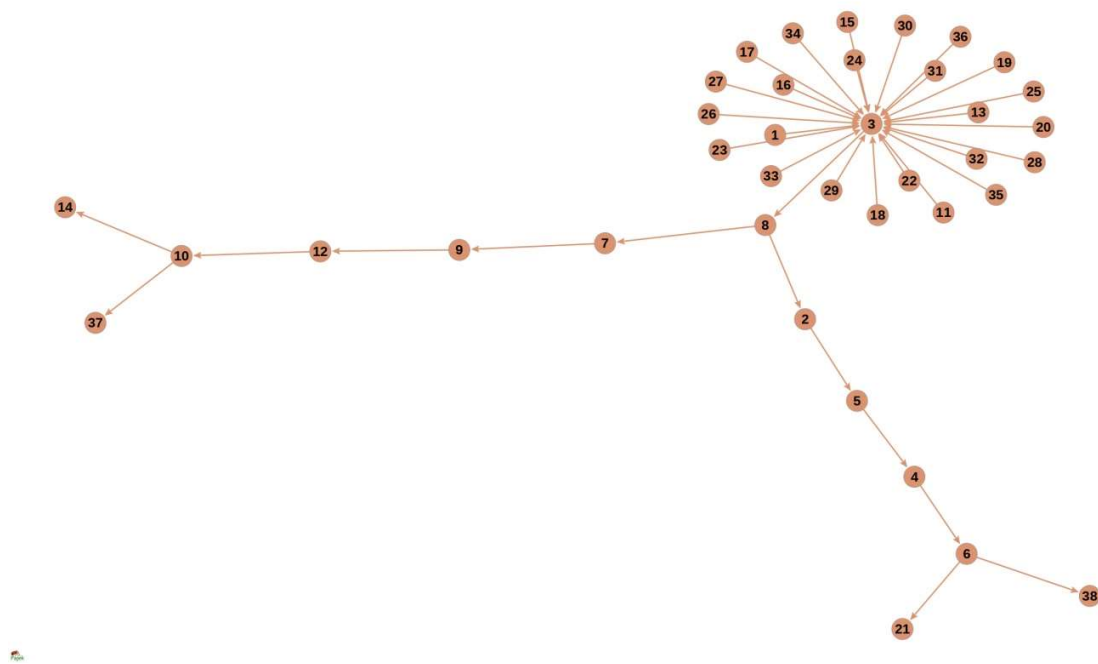

Figure S7. Microgrid and EV Charging.

- [1] "Nuytten T, 2013, Appl Energ, V104, P583, Doi 10.1016/j.apenergy.2012.11.029"
- [2] "Ahmad F, 2017, Sustain Cities Soc, V35, P552, Doi 10.1016/j.scs.2017.09.008"
- [3] "Van Roy J, 2014, Ieee T Sustain Energ, V5, P1389, Doi 10.1109/tste.2014.2314754"
- [4] "Wang D, 2020, Appl Sci-basel, V10, Doi 10.3390/app10186500"
- [5] "Wang D, 2020, Appl Sci-basel, V10, Doi 10.3390/app10062053"
- [6] "Cheikh-mohamad S, 2021, Appl Sci-basel, V11, Doi 10.3390/app11041770"
- [7] "Garcia-trivino P, 2018, Ieee J Em Sel Top P, V6, P726, Doi 10.1109/jestpe.2018.2796029"
- [8] "Liu N, 2015, Ieee T Ind Electron, V62, P4878, Doi 10.1109/tie.2015.2404316"
- [9] "Wang Sq, 2020, Appl Energ, V259, Doi 10.1016/j.apenergy.2019.114146"
- [10] "Wang Sq, 2021, J Power Sources, V482, Doi 10.1016/j.jpowsour.2020.229019"
- [11] "Leadbetter J, 2012, Energ Buildings, V55, P685, Doi 10.1016/j.enbuild.2012.09.035"
- [12] "Wang Sq, 2020, Energy, V207, Doi 10.1016/j.energy.2020.118228"
- [13] "Bozchalui M.c., 2012, P 2012 Ieee Pow En S, P1"
- [14] "Wei Yf, 2022, J Energy Storage, V55, Doi 10.1016/j.est.2022.105670"
- [15] "Huang J, 2012, P Amer Contr Conf, P276"
- [16] "Passey R, 2011, Energ Policy, V39, P6280, Doi 10.1016/j.enpol.2011.07.027"
- [17] "Baetens R, 2012, Appl Energ, V96, P74, Doi 10.1016/j.apenergy.2011.12.098"
- [18] "International Energy Agency, 2012, En Techn Persp 2012"
- [19] "Nguyen Hk, 2012, J Commun Netw-s Kor, V14, P662, Doi 10.1109/jcn.2012.00032"
- [20] "Duvall M., 2007, 1015325 El Pow Res I 1015325 El Pow Res I"
- [21] "Krim Y, 2021, Appl Sci-basel, V11, Doi 10.3390/app11094127"
- [22] "Leemput N., 2011, Inn Smart Grid Techn, P1"
- [23] "[anonymous], 2013, Flemish Living Lab E"
- [24] "Luyten S., 2013, P 22 Int C Exh El Di, P1"
- [25] "Van Roy J., 2011, Eur El Veh C Eevc, P1"
- [26] "[anonymous], 2013, Flemish Regulator En"
- [27] "Geth F., 2012, Inn Smart Grid Techn, P1"
- [28] "Mathoy A., Definition Implement"
- [29] "Us Epa, 2006, Epa420r06017"
- [30] "Janssens D., 2013, Onderzoek Verplaatsi"
- [31] "Ricaud C., Connection System Re"
- [32] "Lyon Tp, 2012, Energ Policy, V41, P259, Doi 10.1016/j.enpol.2011.10.045"
- [33] "Brooks A. W., 2013, P Evs27 Int Batt Hyb, P1"
- [34] "Verbruggen B, 2011, Innovative Smart Gri, P1"
- [35] "European Parliament, 2010, Official J L, V153, P13, Doi Doi 10.3000/17252555.1\_2010.153.eng"
- [36] "Mohammed Am, 2022, Sustain Energy Grids, V32, Doi 10.1016/j.segan.2022.100820"
- [37] "Cheikh-mohamad S, 2022, Appl Sci-basel, V12, Doi 10.3390/app12094323"
